# Supplementary material
Source: PubMed Central journal article supplement (PMC1502276)
Supplement: pnas_0508622103_3.pdf [file pnas_0508622103_3.pdf]

**Table 1. Energetics and dynamics of Coulomb explosion of deuterium containing homonuclear  $(D_2)_n$  clusters and heteronuclear  $(A_k^{q_A} B_\ell^{q_B})_n$  or  $(A_k^{q_A} B_\ell^{q_B} C_p^{q_C})_n$  clusters at  $I_M = 10^{18} \text{ W}\cdot\text{cm}^{-2}$**

| Cluster     | $\rho_{\text{mol}},^* \text{ \AA}^{-3}$ | $q_{\text{mol}} \text{ or } q_B^\dagger$ | $Z, \text{ eV SIM}^\ddagger;$<br><b>EML</b> <sup>§¶</sup> | $\kappa \text{ SIM}^\ddagger;$<br><b>EML</b> <sup>§¶</sup> | $a, \text{ fs}^{-1} \text{ SIM};$<br><b>EML</b> <sup>¶  </sup> |
|-------------|-----------------------------------------|------------------------------------------|-----------------------------------------------------------|------------------------------------------------------------|----------------------------------------------------------------|
| $(D_2)_n$   | 0.025                                   | 2                                        | 12.5; 13.6                                                | 0.61; 0.60                                                 | 0.16; 0.17                                                     |
| $(CD_4)_n$  | 0.016                                   | 8                                        | 42.5; 46.7                                                | 0.70; 0.60                                                 | 0.27                                                           |
| $(DI)_n$    | 0.013                                   | 22                                       | 115; 165                                                  | 0.80; 0.83                                                 | 0.50; 0.45                                                     |
| $(CD_3I)_n$ | 0.010                                   | 26                                       | 130; 181                                                  | 0.80; 0.83                                                 |                                                                |

Simulation data (SIM) are compared with the results of the electrostatic model (EML). The cluster initial radius is related to  $n$  by  $R_0 = (3n/4\pi\rho_{\text{mol}})^{1/3}$ .

\*Initial molecular density of molecular ion.

†Ion charge  $q_{\text{mol}} = kq_A + \ell q_B + pq_C$  for cases A and B, and  $q_{\text{mol}} = \ell q_B + pq_C$  for ECLHH, where  $q_I = 22$  is an average charge in the size domain  $n = 1061\text{--}2171$ , and  $q_C = 4$  for  $(CD_3I)_{2171}$ .

‡ $E_M(n) = Zn^{2/3}$  and  $\kappa = E_M(n)/E_{\text{av}}(n)$ , with  $Z$  and  $\kappa$  being independent of  $n$ .

§See Fig. 3.

¶See text. For the ECLHHs, we neglect a weak cluster size dependence of  $Z$ , due to the dependence of  $q_I$  on  $n$ , which arises from ignition and screening effects on inner ionization [Last, I. & Jortner, J. (2004) *J. Chem. Phys.* **120**, 1336–1347; Last, I. & Jortner, J. (2005) *Proc. Natl. Acad. Sci. USA* **102**, 1291–1295].

||From the time dependence of the first moment of the distribution of the light ions,  $\langle R \rangle = \langle R \rangle_0 = a(t - t_{\text{onset}})$ .
