# Supplementary material
Source: PubMed Central journal article supplement (PMC1502276)

(DI)<sub>2171</sub>

(a) 0fs

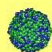

(b) 16.5fs

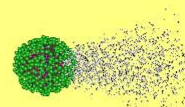

(c) 23.5fs

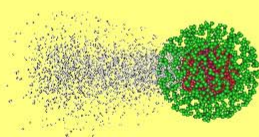

(d) 31.0fs

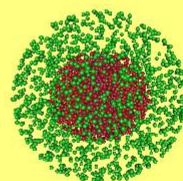

(e) 40.1fs

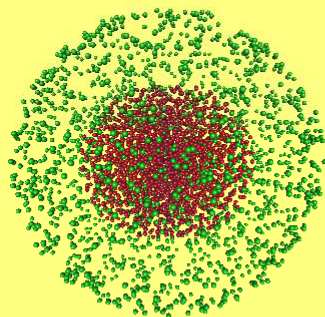

(f) 45.4fs

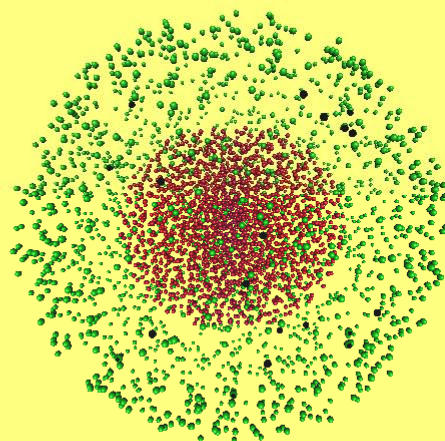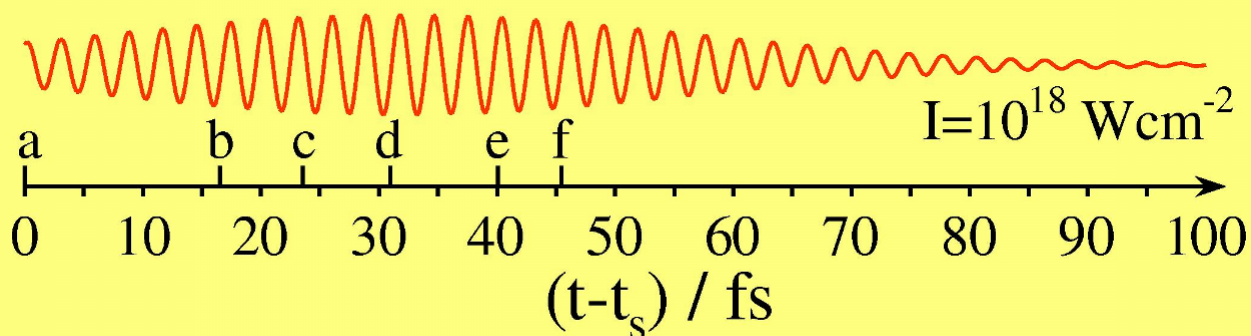

Fig. 1s

Supplement: pnas_0508622103_1.pdf [file pnas_0508622103_1.pdf]
